# Supplementary material
Source: PubMed Central journal article supplement (PMC6698448)
Supplement: NIHMS1035393-supplement-Statistical_Model_Supplementary_Content.pdf [file NIHMS1035393-supplement-Statistical_Model_Supplementary_Content.pdf]

The LOGISTIC Procedure

**Model Information**

**Data Set** WORK.ANALYSIS1  
**Response Variable** ecig\_3level  
**Number of Response Levels** 3  
**Model** cumulative logit  
**Optimization Technique** Fisher's scoring

**Number of Observations Read** 199

**Number of Observations Used** 182

**Response Profile**

| <b>Ordered Value</b> | <b>ecig_3level</b> | <b>Total Frequency</b> |
|----------------------|--------------------|------------------------|
| 1                    | Current            | 45                     |
| 2                    | Former             | 77                     |
| 3                    | Never              | 60                     |

**Probabilities modeled are cumulated over the lower Ordered Values.**

Note: 17 observations were deleted due to missing values for the response or explanatory variables.

**Class Level Information**

| <b>Class</b>              | <b>Value</b>      | <b>Design Variables</b> |   |   |
|---------------------------|-------------------|-------------------------|---|---|
| <b>ecig_health_hazard</b> | <b>Minor</b>      | 1                       | 0 | 0 |
|                           | <b>Moderate</b>   | 0                       | 1 | 0 |
|                           | <b>Not at all</b> | 0                       | 0 | 0 |
|                           | <b>Serious</b>    | 0                       | 0 | 1 |
| <b>cig_3level</b>         | <b>Current</b>    | 1                       | 0 |   |
|                           | <b>Former</b>     | 0                       | 1 |   |
|                           | <b>Never</b>      | 0                       | 0 |   |

### Model Convergence Status

Convergence criterion (GCONV=1E-8) satisfied.

### Score Test for the Proportional Odds Assumption

| Chi-Square | DF | Pr > ChiSq |
|------------|----|------------|
| 14.2237    | 9  | 0.1146     |

### Model Fit Statistics

| Criterion | Intercept Only | Intercept and Covariates |
|-----------|----------------|--------------------------|
| AIC       | 395.391        | 387.887                  |
| SC        | 401.799        | 423.132                  |
| -2 Log L  | 391.391        | 365.887                  |

### Testing Global Null Hypothesis: BETA=0

| Test             | Chi-Square | DF | Pr > ChiSq |
|------------------|------------|----|------------|
| Likelihood Ratio | 25.5039    | 9  | 0.0025     |
| Score            | 23.6418    | 9  | 0.0049     |
| Wald             | 23.4345    | 9  | 0.0053     |

### Type 3 Analysis of Effects

| Effect             | DF | Wald Chi-Square | Pr > ChiSq |
|--------------------|----|-----------------|------------|
| age                | 1  | 10.3966         | 0.0013     |
| whitenonhisp       | 1  | 10.4430         | 0.0012     |
| collegegrad        | 1  | 0.0712          | 0.7896     |
| pregnant           | 1  | 4.5147          | 0.0336     |
| cig_3level         | 2  | 0.9520          | 0.6213     |
| ecig_health_hazard | 3  | 3.1408          | 0.3704     |

### Analysis of Maximum Likelihood Estimates

| Parameter          |          | DF | Estimate | Standard Error | Wald Chi-Square | Pr > ChiSq |
|--------------------|----------|----|----------|----------------|-----------------|------------|
| Intercept          | Current  | 1  | 0.2058   | 1.1359         | 0.0328          | 0.8562     |
| Intercept          | Former   | 1  | 2.2360   | 1.1511         | 3.7731          | 0.0521     |
| age                |          | 1  | -0.0831  | 0.0258         | 10.3966         | 0.0013     |
| whitenonhisp       |          | 1  | 1.1840   | 0.3664         | 10.4430         | 0.0012     |
| collegegrad        |          | 1  | -0.1077  | 0.4036         | 0.0712          | 0.7896     |
| pregnant           |          | 1  | -0.7187  | 0.3382         | 4.5147          | 0.0336     |
| cig_3level         | Current  | 1  | 0.5693   | 0.7706         | 0.5459          | 0.4600     |
| cig_3level         | Former   | 1  | 0.2456   | 0.8450         | 0.0845          | 0.7713     |
| ecig_health_hazard | Minor    | 1  | -0.1092  | 0.3989         | 0.0749          | 0.7843     |
| ecig_health_hazard | Moderate | 1  | 0.2150   | 0.4197         | 0.2625          | 0.6084     |
| ecig_health_hazard | Serious  | 1  | -0.7145  | 0.5677         | 1.5841          | 0.2082     |

### Odds Ratio Estimates

| Effect                                    | Point Estimate | 95% Wald Confidence Limits |       |
|-------------------------------------------|----------------|----------------------------|-------|
| age                                       | 0.920          | 0.875                      | 0.968 |
| whitenonhisp                              | 3.267          | 1.593                      | 6.700 |
| collegegrad                               | 0.898          | 0.407                      | 1.981 |
| pregnant                                  | 0.487          | 0.251                      | 0.946 |
| cig_3level Current vs Never               | 1.767          | 0.390                      | 8.002 |
| cig_3level Former vs Never                | 1.278          | 0.244                      | 6.697 |
| ecig_health_hazard Minor vs Not at all    | 0.897          | 0.410                      | 1.959 |
| ecig_health_hazard Moderate vs Not at all | 1.240          | 0.545                      | 2.823 |
| ecig_health_hazard Serious vs Not at all  | 0.489          | 0.161                      | 1.489 |

### Association of Predicted Probabilities and Observed Responses

|                    |      |           |       |
|--------------------|------|-----------|-------|
| Percent Concordant | 67.3 | Somers' D | 0.350 |
| Percent Discordant | 32.3 | Gamma     | 0.352 |

**Association of Predicted Probabilities and  
Observed Responses**

|                     |       |              |       |
|---------------------|-------|--------------|-------|
| <b>Percent Tied</b> | 0.4   | <b>Tau-a</b> | 0.229 |
| <b>Pairs</b>        | 10785 | <b>c</b>     | 0.675 |
